# Supplementary material for: Feasibility & Acceptability of Patient and Family Directed Active Music Making during Pediatric Bone Marrow Transplant Process
Source: MDPI journal article supplement (doi:10.3390/ejihpe12120131), 2022-12-08
Supplement: s1 [file s1]

Participant ID #: \_\_\_\_\_

Journal Form

Date: \_\_\_\_\_

Check any of the following that describe how you engaged in actively making-music today:

- \_\_\_\_ Played for my child
- \_\_\_\_ Played with my child
- \_\_\_\_ Played with other family members: Indicate who: \_\_\_\_\_
- \_\_\_\_ Played with staff
- \_\_\_\_ Some other way: Please indicate: \_\_\_\_\_
- \_\_\_\_\_
- \_\_\_\_\_
- \_\_\_\_\_

Please share your experiences, thoughts, feelings about engaging with actively making-music. You can include any aspect of our experience such as why you chose to make music, how it made you feel to make music, what was challenging about making music, if or how it helped to make music, or what you learned from making music.

\_\_\_\_\_

\_\_\_\_\_

\_\_\_\_\_

\_\_\_\_\_

\_\_\_\_\_

\_\_\_\_\_

\_\_\_\_\_

\_\_\_\_\_

\_\_\_\_\_

\_\_\_\_\_

\_\_\_\_\_

\_\_\_\_\_

\_\_\_\_\_

\_\_\_\_\_

\_\_\_\_\_

\_\_\_\_\_

\_\_\_\_\_

\_\_\_\_\_
